# Supplementary material
Source: HighWire-hosted journal article supplement (https://jmg.bmj.com/content/61/4/305)
Supplement: inline-supplementary-material-3 [file inline-supplementary-material-3.pdf]

### A) How many types/tiers of VCF-derived files do you generate and store?

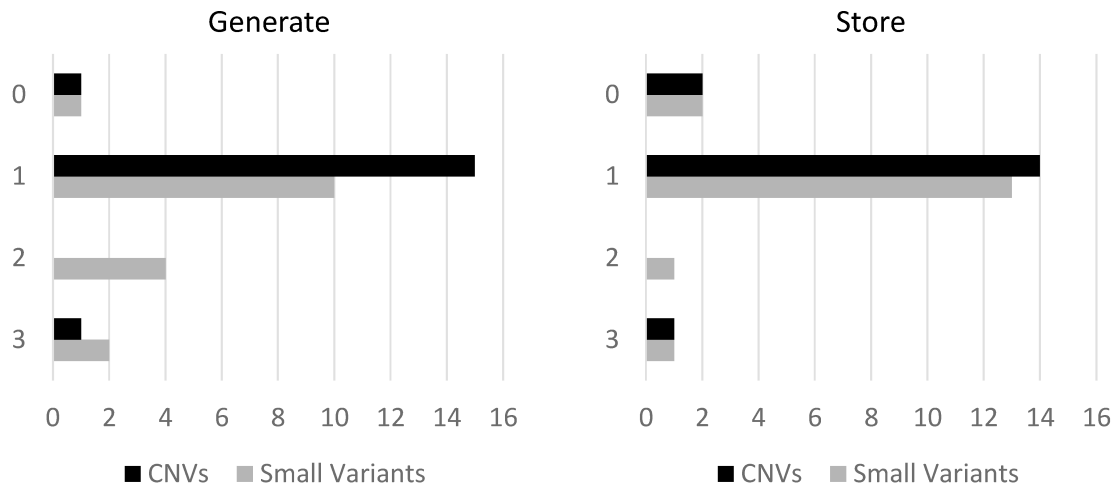

### B) Which of the following identifiers are present against a detected variant in the output of your NGS pipeline (VCF file and derived files)?

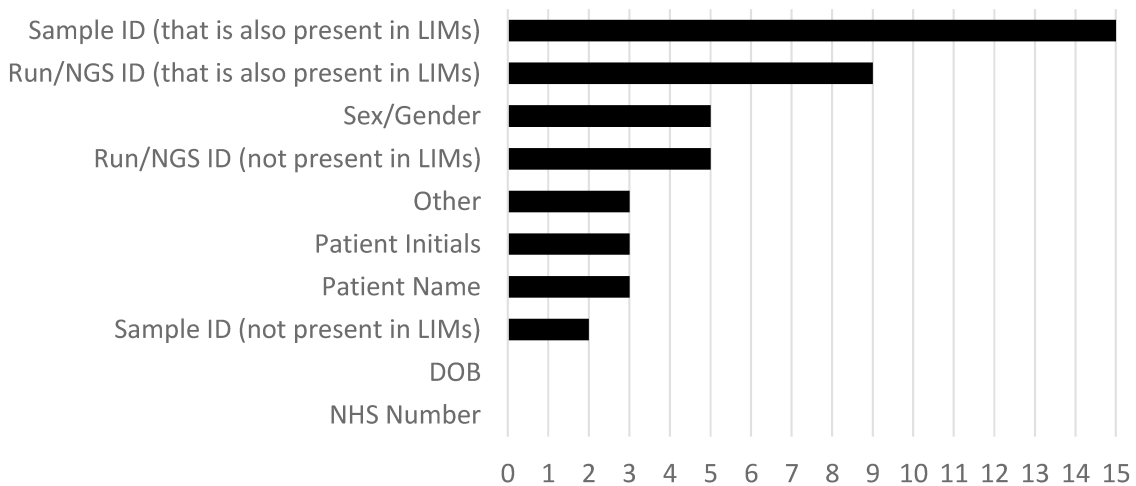

**Supplementary Figure 1: Additional questions pertaining to variant workflows.** A: Approaches to storing intermediary files generated as part of the workflow. B: The range of patient identifiers available within the workflow upstream of entry in the LIMs.

In the event a 'Cold' VUS is re-classified, how confidently/readily could you identify all patients in whom that variant had been identified?

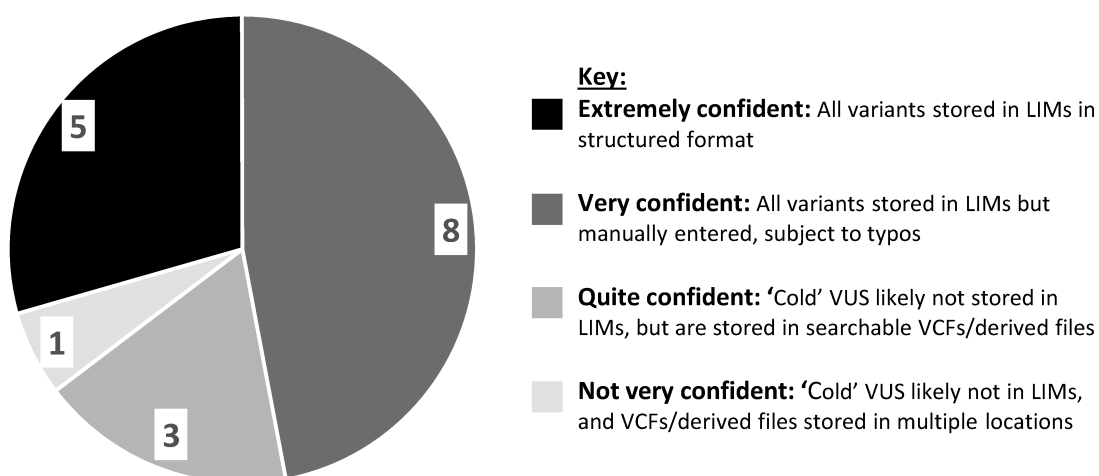

**Supplementary Figure 2:** Confidence of responding laboratories in ability to reliably retrieve 'cold' VUS variant information in the event of reclassification.
